# Supplementary material for: Mitochondrial Tim9 protects Tim10 from degradation by the protease Yme1
Source: Oxford University Press journal article supplement (doi:10.1042/bsr20150038), 2015-03-20
Supplement: bsr035e193ntsadd.pdf [file bsr035e193ntsadd.pdf]

**Supplementary Table S1. Oligonucleotide primers used in this study.**

| <b>Primer name</b> | <b>Sequence</b>                                            |
|--------------------|------------------------------------------------------------|
| 9C1F               | CTAATCTGGTAGAAAGAAGTTTCACAGACTGTGTC                        |
| 9C1R'              | GACACAGTCTGTGAAACTTCTTTCTACCAGATTAG                        |
| 9C2F               | GAAAGATGTTTCACAGACTCCGTCAATGACTTCACAACATC                  |
| 9C2R               | GATGTTGTGAAGTCATTGACGGAGTCTGTGAAACATCTTTC                  |
| 9C3F               | CAATAAGGAACAAACATCCATCATGAAGTGCTCAG                        |
| 9C3R               | CTGAGCACTTCATGATGGATGTTTGTTCCTTATTG                        |
| 9C4F               | CAAACATGCATCATGAAGTCCTCAGAAAAGTTCTTGAAGC                   |
| 9C4R               | GCTTCAAGAACTTTTCTGAGGACTTCATGATGCATGTTTG                   |
| 9loxF              | ACAGTATTTTACGGGGCACAAATCAAGAACAATAAGACAGCACTGT<br>AAAGCCAC |
| 9loxR              | AATGGGCTACACCAGAGATACATAATTAGATATATATACGCCAGTAC<br>ACCCCGC |
| Yme1F1             | ATAATACATTGTGGATAGAACGAAAACAGAGACGTGATAGCGGAT              |
| Yme1R1             | GAGGTAGGTTTCCTTCATACGTTTAACTTCTTAGAATAAAAGAATT             |
